# Supplementary material for: The multiple bonding in heavier group 14 element alkene analogues is stabilized mainly by dispersion force effects
Source: PubMed Central journal article supplement (PMC6054042; doi:10.1039/c5sc02707a), 2015-08-19
Supplement: SC-006-C5SC02707A-s001.pdf [file SC-006-C5SC02707A-s001.pdf]

## The Multiple Bonding in Heavier Group 14 Element Alkene Analogues is Stabilized Mainly by Dispersion Force Effects

Jing-Dong Guo,<sup>†</sup> David J. Liptrot,<sup>‡</sup> Shigeru Nagase,<sup>\*,†</sup> and Philip P. Power.<sup>\*,‡</sup>

<sup>†</sup> *Fukui Institute for Fundamental Chemistry, Kyoto University, Takano-Nishiraki-cho  
34-4, Sakyo-ku, Kyoto, Japan 606-8103, Japan.*

<sup>‡</sup> *Department of Chemistry, University of California, One Shields Avenue, Davis,  
California 95616, United States.*

### Supporting Information

#### Contents

|                                        |         |
|----------------------------------------|---------|
| Table S1, Table S2, Table S3, Table S4 | Page S2 |
| Table S5                               | Page S3 |

**Table S1.** Calculated binding energies (kcal mol<sup>-1</sup>) of E<sub>2</sub>R<sub>4</sub> (E = Ge or Sn; R = CH(SiMe<sub>3</sub>)<sub>2</sub>) with a *syn,anti* configuration for the ER<sub>2</sub> units and H-C-E-C angles set at experimental values.

| [E{CH(SiMe <sub>3</sub> ) <sub>2</sub> ] <sub>2</sub> ] <sub>2</sub> → 2E{CH(SiMe <sub>3</sub> ) <sub>2</sub> ] <sub>2</sub> |            |             |            |             |
|------------------------------------------------------------------------------------------------------------------------------|------------|-------------|------------|-------------|
|                                                                                                                              | E = Ge     |             | E = Sn     |             |
|                                                                                                                              | B3PW91     | B3PW91-D3   | B3PW91     | B3PW91-D3   |
| ΔE <sup>a</sup>                                                                                                              | 5.6 (-2.3) | 40.2 (28.7) | 12.0 (2.1) | 38.5 (26.3) |
| ΔE <sup>a,b</sup>                                                                                                            | 14.0 (6.5) | 50.4 (39.4) | 13.3 (3.1) | 40.5 (28.8) |

<sup>a</sup> Binding energy. In parentheses are values with ZPE and BSSE corrections.  
<sup>b</sup> The Ge and Sn monomers are optimized by fixing the (H-C-E-C) torsion angles at experimental values: 2° for GeR<sub>2</sub>; 15° for SnR<sub>2</sub>.

**Table S2.** Calculated structural data for the Ge<sub>2</sub>R<sub>4</sub> and Sn<sub>2</sub>R<sub>4</sub> (R = CH(SiMe<sub>3</sub>)<sub>2</sub>) dimers with the GeR<sub>2</sub> and SnR<sub>2</sub> units within the dimers in *syn,syn* configuration.

|                      | Ge <sub>2</sub> R <sub>4</sub> |                            |                            | Sn <sub>2</sub> R <sub>4</sub> |                            |                            |
|----------------------|--------------------------------|----------------------------|----------------------------|--------------------------------|----------------------------|----------------------------|
|                      | B3PW91                         | B3PW91-D3                  | B97-D3                     | B3PW91                         | B3PW91-D3                  | B97-D3                     |
| E-E (Å)              | 2.428                          | 2.377                      | 2.452                      | 2.842                          | 2.765                      | 2.855                      |
| E-C (Å)              | 2.034 (av.)                    | 2.012 (av.)                | 2.051 (av.)                | 2.239 (av.)                    | 2.210 (av.)                | 2.267 (av.)                |
| C-E-C (°)            | 98.7 (av.)                     | 98.1 (av.)                 | 97.7 (av.)                 | 96.3 (av.)                     | 96.0 (av.)                 | 95.3 (av.)                 |
| C-E-E (°)            | 122.6 (av.)                    | 121.0 (av.)                | 120.2 (av.)                | 121.2 (av.)                    | 119.2 (av.)                | 118.6 (av.)                |
| C-E-E-C (°)          | -51.6 (av.)<br>164.0 (av.)     | -56.3 (av.)<br>167.2 (av.) | -58.7 (av.)<br>167.4 (av.) | -58.7 (av.)<br>168.7 (av.)     | -62.9 (av.)<br>163.4 (av.) | -65.2 (av.)<br>166.9 (av.) |
| Trans-bent angle (°) | 34.3 (av.)                     | 38.0 (av.)                 | 40.1 (av.)                 | 39.0 (av.)                     | 43.4 (av.)                 | 44.8 (av.)                 |

**Table S3.** Calculated binding energies (kcal mol<sup>-1</sup>) of the E<sub>2</sub>R<sub>4</sub> dimers (E = Ge or Sn; R = CH(SiMe<sub>3</sub>)<sub>2</sub>) with each ER<sub>2</sub> unit within the dimer in a *syn,syn* configuration.

| [E{CH(SiMe <sub>3</sub> ) <sub>2</sub> ] <sub>2</sub> ] <sub>2</sub> → 2E{CH(SiMe <sub>3</sub> ) <sub>2</sub> ] <sub>2</sub> |        |             |        |        |             |        |
|------------------------------------------------------------------------------------------------------------------------------|--------|-------------|--------|--------|-------------|--------|
|                                                                                                                              | E = Ge |             |        | E = Sn |             |        |
|                                                                                                                              | B3PW91 | B3PW91-D3   | B97-D3 | B3PW91 | B3PW91-D3   | B97-D3 |
| ΔE <sup>a</sup>                                                                                                              | -4.6   | 30.3 (29.6) | 24.8   | 6.3    | 33.7 (34.0) | 28.9   |
| ΔE <sup>b</sup>                                                                                                              | -14.1  | 18.9        |        | -3.8   | 20.0        |        |
| ΔH <sup>c</sup>                                                                                                              | -13.5  | 20.0        |        | -3.6   | 21.2        |        |
| -TΔS <sup>c</sup>                                                                                                            | -18.5  | -20.7       |        | -16.6  | -21.5       |        |
| ΔG <sup>c</sup>                                                                                                              | -32.0  | -0.7        |        | -20.2  | -0.3        |        |

<sup>a</sup> Binding energy. In parentheses are MP2 values.  
<sup>b</sup> With ZPE and BSSE corrections.  
<sup>c</sup> At 25°C (298 K) and 1atm.

**Table S4.** Calculated and experimental structural parameters for the dimetallene Pb<sub>2</sub>R<sub>4</sub> (R = CH(SiMe<sub>3</sub>)<sub>2</sub>), in which the Pb{CH(SiMe<sub>3</sub>)<sub>2</sub>]<sub>2</sub> units have the *syn,anti* configuration.

| [Pb{CH(SiMe <sub>3</sub> ) <sub>2</sub> ] <sub>2</sub> ] <sub>2</sub> |                |                |                |                    |
|-----------------------------------------------------------------------|----------------|----------------|----------------|--------------------|
|                                                                       | B3PW91         | B3PW91-D3      | B97-D3         | X-ray <sup>a</sup> |
| E-E (Å)                                                               | 3.202          | 2.956          | 3.073          | 4.129(1)           |
| E-C (Å)                                                               | 2.384(av.)     | 2.345(av.)     | 2.395(av.)     | 2.313(5), 2.323(5) |
| C1-E-C2 (°)                                                           | 106.3          | 106.6          | 106.4          | 93.4(2)            |
| C-E-E (°)                                                             | 108.7<br>121.7 | 108.3<br>116.7 | 107.4<br>119.4 |                    |

<sup>a</sup> Ref. 11.

**Table S5.** Calculations on the dissociation of  $(\text{SnR}_2)_2 \rightarrow 2\text{SnR}_2$  ( $\text{R} = \text{SiMe}^t\text{Bu}_2$ ).

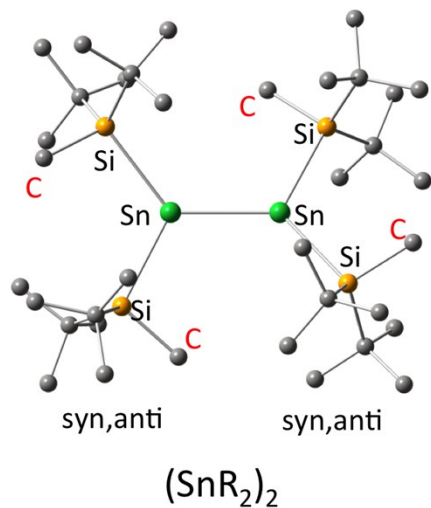

| Unit: kcal/mol                                                                         | Monomer: $\text{SnR}_2$ ( $\text{R} = \text{SiMe}^t\text{Bu}_2$ ) |           |             |
|----------------------------------------------------------------------------------------|-------------------------------------------------------------------|-----------|-------------|
|                                                                                        | B3PW91                                                            | B3PW91-D3 |             |
| Singlet state                                                                          | 0.0                                                               | 0.0       |             |
| Triplet state                                                                          | 4.5                                                               | 6.8       |             |
| $(\text{SnR}_2)_2 \rightarrow 2\text{SnR}_2$ ( $\text{R} = \text{SiMe}^t\text{Bu}_2$ ) |                                                                   |           |             |
| $\Delta E$ (dissociation)                                                              | 36.4                                                              | 59.5      |             |
| $\Delta E$ (BSSE + ZPE)                                                                | 25.8                                                              | 46.8      |             |
| (BSSE, 25°C, 1.0 atm)                                                                  |                                                                   |           |             |
| $\Delta H$                                                                             | 25.9                                                              | 47.3      |             |
| $-\text{T}\Delta S$                                                                    | -17.6                                                             | -20.8     |             |
| $\Delta G$                                                                             | 8.3                                                               | 26.5      |             |
| Dimer: $(\text{SnR}_2)_2$ (syn, anti)                                                  |                                                                   |           |             |
|                                                                                        | B3PW91                                                            | B3PW91-D3 | Exp.        |
| Sn-Sn (Å)                                                                              | 2.702                                                             | 2.647     | 2.668       |
| Sn-Si (Å)                                                                              | 2.665                                                             | 2.597     | 2.660 (av.) |
| Sn-Sn-Si (°)                                                                           | 124.6                                                             | 124.3     | 113.8 (av.) |
| Si-Sn-Si (°)                                                                           | 110.9                                                             | 111.4     | 111.7 (av.) |
| Trans-bending angle $\theta$ (°)                                                       | 0.0                                                               | 0.0       | 1.2         |
| Torsion angle $\tau$ (°)<br>(between Sn planes)                                        | 40.9                                                              | 43.6      | 44.6        |
